# Supplementary material
Source: publisher site journal article supplement (https://www.dovepress.com/article/366922)

**Supplementary Materials Contents**

1. **Supplementary methods**
   1. Patient treatment
   2. Data acquisition of hematological immune-related indices and prognostic information
2. **Supplementary tables**
   1. **Table S1.** Pretreatment hematological characteristics of patients in the primary and testing cohorts
   2. **Table S2.** Univariable analysis in the primary cohort
   3. **Table S3.** Multivariable analysis of three models regarding OS in the primary cohort
3. **Supplementary figures**
   1. **Figure S1.** Risk stratification using Kaplan-Meier survival curves
   2. **Figure S2.** Calibration curve of the final model for 5-year OS

**Patient treatment:**

Per the treatment principle for nasopharyngeal carcinoma (NPC) at the Sun Yat-sen University Cancer Center and First People’s Hospital of Foshan, all included patients were treated with intensity-modulated radiation therapy (IMRT) according to the standard treatment principles for NPC, in agreement with the guidelines specified in the International Commission on Radiation Units and Measurements Reports 50 and 62. The prescribed doses were 66 to 72 Gy at 2.12 to 2.43 Gy/fraction to the planning target volume (PTV) of the primary gross tumor volume (GTVnx), 64 to 70 Gy per 28 to 33 fractions to the PTV of the GTV of involved lymph nodes (GTVnd), 60 to 63 Gy per 28 to 33 fractions to the PTV of the high-risk clinical target volume (CTV1), and 54 to 56 Gy per 28 to 33 fractions to the PTV of the low-risk clinical target volume (CTV2). The median dose delivered was 72.77 ± 1.26 Gy to the PTV of the GTVnx. Neoadjuvant, concurrent, or adjuvant chemotherapy based on platinum was administered in patients with stage II–IV NPC. Patients who developed local recurrence or had persistent disease received salvage therapy, such as secondary radiation, surgery, and chemotherapy. Induction chemotherapy (IC) included docetaxel (60 mg/m2 on day 1), cisplatin (60 mg/m2 on day 1), fluorouracil (600 mg/m2 per day for the first 5 days), or gemcitabine (1000 mg/m2 on days 1 and 8) and cisplatin (80 mg/m2 on day 1), repeated every 3 weeks for two to four cycles. Concurrent chemotherapy included 30–40 mg/m2 cisplatin per week, 80–100 mg/m2 cisplatin on day 1, and 28–37 times of IMRT for radiotherapy. Depending on the individualized physical condition of the patients and the decision of the attending physician, 81.6% of patients received additional concurrent or IC. Salvage treatment, including surgery, reirradiation, and chemotherapy, was administered for recurrent and refractory cases, if necessary.

**Data acquisition of hematological immune-related indices and prognostic information:**

Pretreatment blood samples were collected into ethylene diamine tetraacetic acid (EDTA) anticoagulant tubes and analyzed using a routine method. The full blood count parameters were determined using an XN-9000 automated hematology analyzer (Sysmex, Kobe, Japan), and blood markers were assessed before treatment. Normal reference values were determined according to the *Defining, Establishing, and Verifying Reference Intervals in the Clinical Laboratory, Approved Guideline, Third Edition*. The Youden Index of the receiver operating characteristic curve was calculated and used as the cutoff point.

**Table S1.** Pretreatment hematological characteristics of patients in the primary and testing cohorts

| **Characteristics** | **Total** |  | **Primary** |  | **Testing** | | ***P*-value** | |
| --- | --- | --- | --- | --- | --- | --- | --- | --- |
| **N=1706** |  | **(N=1320)** |  | **(N=386)** | |
| **ALC**#**, 109/L** | 1706 (100%) |  | 1.9 (1.5–2.3) |  | 1.8 (1.5–2.3) | | 0.533* | |
| **ALC normal cutoff** |  |  |  |  |  | | 0.938* | |
| <1.1 | 1504 (88.2%) |  | 1165 (88.3%) |  | 339 (87.8%) | |  | |
| 1.1–3.2 | 68 (4%) |  | 53 (4%) |  | 15 (3.9%) | |  | |
| ≥3.2 | 134 (7.9%) |  | 102 (7.7%) |  | 32 (8.3%) | |  | |
| **ALC ROC cutoff** |  |  |  |  |  | | 0.107* | |
| <1.96 | 969 (56.8%) |  | 736 (55.8%) |  | 233 (60.4%) | |  | |
| ≥1.96 | 737 (43.2%) |  | 584 (44.2%) |  | 153 (39.6%) | |  | |
| **ALB**#**, 109g/L** | 1706 (100%) |  | 45 (42.9~47.1) |  | 43.2 (41.1–45.3) | | <0.001 | |
| **ALB normal cutoff** |  |  |  |  |  | | <0.001 | |
| <40 | 1544 (90.5%) |  | 1222 (92.6%) |  | 322 (83.4%) | |  | |
| 40–55 | 2 (0.1%) |  | 1 (0.1%) |  | 1 (0.3%) | |  | |
| ≥55 | 160 (9.4%) |  | 97 (7.3%) |  | 63 (16.3%) | |  | |
| **ALB ROC cutoff** |  |  |  |  |  | | <0.001 | |
| <44.55 | 851 (49.9%) |  | 588 (44.5%) |  | 263 (68.1%) | |  | |
| ≥44.55 | 855 (50.1%) |  | 732 (55.5%) |  | 123 (31.9%) | |  | |
| **LDH**#**, U/L** | 1706 (100%) |  | 171.5 (150.4–199.3) | | 180 (162.2–204.0) | | 0.005 | |
| **LDH normal cutoff** |  |  |  |  |  | | 0.141* | |
| <120 | 1551 (90.9%) |  | 1202 (91.1%) |  | 349 (90.4%) | |  | |
| 120–250 | 106 (6.2%) |  | 76 (5.8%) |  | 30 (7.8%) | |  | |
| ≥250 | 49 (2.9%) |  | 42 (3.2%) |  | 7 (1.8%) | |  | |
| **LDH ROC cutoff** |  |  |  |  |  | | <0.001 | |
| <170.85 | 770 (45.1%) |  | 645 (48.9%) |  | 125 (32.4%) | |  | |
| ≥170.85 | 936 (54.9%) |  | 675 (51.1%) |  | 261 (67.6%) | |  | |
| **PLT**#**, 109/L** | 1706 (100%) |  | 233 (197–275) |  | 227 (190–273.8) | | 0.070* | |
| **PLT normal cutoff** |  |  |  |  |  | | 0.390* | |
| <100 | 1609 (94.3%) |  | 1240 (93.9%) |  | 369 (95.6%) | |  | |
| 100–350 | 79 (4.6%) |  | 66 (5%) |  | 13 (3.4%) | |  | |
| ≥350 | 18 (1.1%) |  | 14 (1.1%) |  | 4 (1%) | |  | |
| **PLT ROC cutoff** |  |  |  |  |  | | 0.176* | |
| <201.8 | 500 (29.3%) |  | 376 (28.5%) |  | 124 (32.1%) | |  | |
| ≥201.8 | 1206 (70.7%) |  | 944 (71.5%) |  | 262 (67.9%) | |  | |
| **ANC**#**, 109/L** | 1706 (100%) |  | 4.2 (3.4–5.3) |  | 4 (3.2–5) | | 0.014 | |
| **ANC normal cutoff** | |  |  |  |  | | 0.529* | |
| <1.8 | 1468 (86%) |  | 1129 (85.5%) |  | 339 (87.8%) | |  | |
| 1.8–6.3 | 220 (12.9%) |  | 177 (13.4%) |  | 43 (11.1%) | |  | |
| ≥6.3 | 18 (1.1%) |  | 14 (1.1%) |  | 4 (1%) | |  | |
| **ANC ROC cutoff** |  |  |  |  |  | | 0.021 | |
| <5.59 | 1347 (79%) |  | 1026 (77.7%) |  | 321 (83.2%) | |  | |
| ≥5.59 | 359 (21%) |  | 294 (22.3%) |  | 65 (16.8%) | |  | |
| **WBC**#**,** **109**/L | 1706 (100%) |  | 6.9 (5.7–8.3) |  | 6.7 (5.6–7.9) | | 0.124* | |
| **WBC normal cutoff** | |  |  |  |  | | 0.913* | |
| <3.5 | 1477 (86.6%) |  | 1142 (86.5%) |  | 335 (86.8%) | |  | |
| 3.5–9.5 | 210 (12.3%) |  | 164 (12.4%) |  | 46 (11.9%) | |  | |
| ≥9.5 | 19 (1.1%) |  | 14 (1.1%) |  | 5 (1.3%) | |  | |
| **WBC ROC cutoff** |  |  |  |  |  | | 0.013 | |
| <7.4 | 1053 (61.7%) |  | 794 (60.2%) |  | 259 (67.1%) | |  | |
| ≥7.4 | 653 (38.3%) |  | 526 (39.8%) |  | 127 (32.9%) | |  | |
| **MON**#**, 109/L** | 1706 (100%) |  | 0.4 (0.3–0.6) |  | 0.4 (0.4–0.6) | | 0.140* | |
| **MON normal cutoff** | |  |  |  |  | | <0.001 | |
| <0.1 | 1448 (84.9%) |  | 1147 (86.9%) |  | 301 (78%) | |  | |
| 0.1–0.6 | 250 (14.7%) |  | 169 (12.8%) |  | 81 (21%) | |  | |
| ≥0.6 | 8 (0.5%) |  | 4 (0.3%) |  | 4 (1%) | |  | |
| **MON ROC cutoff** |  |  |  |  |  | | 0.003 | |
| <0.625 | 1466 (85.9%) |  | 1152 (87.3%) |  | 314 (81.3%) | |  | |
| ≥0.625 | 240 (14.1%) |  | 168 (12.7%) |  | 72 (18.7%) | |  | |
| **HGB**#**, g/L** | 1706 (100%) |  | 146 (135–154) |  | 139 (127–148) | | <0.001 | |
| **HGB normal cutoff** | |  |  |  |  | | <0.001 | |
| <130 | 1361 (79.8%) |  | 1096 (83%) |  | 265 (68.7%) | |  | |
| 130–175 | 9 (0.5%) |  | 8 (0.6%) |  | 1 (0.3%) | |  | |
| ≥175 | 336 (19.7%) |  | 216 (16.4%) |  | 120 (31.1%) | |  | |
| **HGB ROC cutoff** |  |  |  |  |  | | <0.001 | |
| <120.85 | 148 (8.7%) |  | 86 (6.5%) |  | 62 (16.1%) | |  | |
| ≥120.85 | 1558 (91.3%) |  | 1234 (93.5%) |  | 324 (83.9%) | |  | |
| **CRP**#**, mg/L** | 1706 (100%) |  | 1.6 (0.7–3.7) |  | 2.3 (1.6–3.5) | | 0.189* | |
| **CRP normal cutoff** |  |  |  |  |  | | 0.482* | |
| 0–3 | 1187 (69.6%) |  | 924 (70%) |  | 263 (68.1%) | |  | |
| ≥3 | 519 (30.4%) |  | 396 (30%) |  | 123 (31.9%) | |  | |
| **CRP ROC cutoff** |  |  |  |  |  | | <0.001 | |
| 0 | 859 (50.4%) |  | 739 (56%) |  | 120 (31.1%) | |  | |
| 1 | 847 (49.6%) |  | 581 (44%) |  | 266 (68.9%) | |  | |
| **PNI**# | 1706 (100%) |  | 54.7 (51.5–57.7) |  | | 52.7 (49.8–55.9) | | <0.001 | |
| **PNI ROC cutoff** |  |  |  |  |  | | <0.001 | |
| <52.85 | 658 (38.6%) |  | 464 (35.2%) |  | 194 (50.3%) | |  | |
| ≥52.85 | 1048 (61.4%) |  | 856 (64.8%) |  | 192 (49.7%) | |  | |
| **PNLR**# | 1706 (100%) |  | 525.8 (354.6–769.6) |  | | 481.3 (341.7–721.4) | | 0.066* | |
| **PNLR ROC cutoff** |  |  |  |  |  | | 0.259* | |
| <673.08 | 1156 (67.8%) |  | 885 (67%) |  | 271 (70.2%) | |  | |
| ≥673.08 | 550 (32.2%) |  | 435 (33%) |  | 115 (29.8%) | |  | |
| **PLR**# | 1706 (100%) |  | 123.8 (95.8–163.7) |  | | 122.1 (95.5–159.6) | | 0.315* | |
| **PLR ROC cutoff** |  |  |  |  |  | | 0.900* | |
| <150.65 | 1178 (69.1%) |  | 910 (68.9%) |  | 268 (69.4%) | |  | |
| ≥150.65 | 528 (30.9%) |  | 410 (31.1%) |  | 118 (30.6%) | |  | |
| **NLR**# | 1706 (100%) |  | 2.2 (1.7–3.0) |  | 2.1 (1.6–3.0) | | 0.205* | |
| **NLR ROC cutoff** |  |  |  |  |  | | 0.151* | |
| <2.73 | 1146 (67.2%) |  | 875 (66.3%) |  | 271 (70.2%) | |  | |
| ≥2.73 | 560 (32.8%) |  | 445 (33.7%) |  | 115 (29.8%) | |  | |

***Abbreviations:*** ALB, albumin; ALC, absolute lymphocyte count; ANC, absolute neutrophil count; CRP, C-reactive protein; HGB, hemoglobin; LDH, lactate dehydrogenase; MON, monocyte; NLR, neutrophil-to-lymphocyte ratio; PLR, platelet-to-lymphocyte ratio; PLT, platelet count; PNI, prognostic nutritional index; PNLR, platelet× neutrophil-to-lymphocyte ratio; ROC, receiver operating characteristic; WBC, white blood cell

***Notes:*** Data are presented as numbers with percentages or as medians with interquartile ranges.

#: as continuous variables

*: P-values >0.05, P-values of differences in distribution were calculated using Fisher’s exact test or the chi-square test for categorical variables.

**Table S2.** Univariable analysis in the primary cohort

| **Characteristics** | **OS** | |  | **DMFS** | |  | **LRFS** | |  | **PFS** | |
| --- | --- | --- | --- | --- | --- | --- | --- | --- | --- | --- | --- |
| **Survival** | ***P*-value** |  | **Survival** | ***P*-value** |  | **Survival** | ***P*-value** |  | **Survival** | ***P*-value** |
| **Age (years)** |  | <0.001 |  |  | 0.333 |  |  | 0.603 |  |  | 0.042 |
| **Sex** |  | 0.060 |  |  | 0.730 |  |  | 0.392 |  |  | 0.902 |
| Male | 85.86 |  |  | 86.28 |  |  | 90.22 |  |  | 77.39 |  |
| Female | 89.61 |  |  | 87.01 |  |  | 88.44 |  |  | 76.97 |  |
| **Histologic type** |  | 0.093 |  |  | 0.475 |  |  | 0.315 |  |  | 0.106 |
| WHO type 1/2 | 79.40 |  |  | 82.71 |  |  | 85.54 |  |  | 68.56 |  |
| WHO type 3 | 87.25 |  |  | 86.67 |  |  | 89.95 |  |  | 77.73 |  |
| **EBV DNA** (103 copies/mL) |  | <0.001 |  |  | <0.001 |  |  | 0.135 |  |  | <0.001 |
| <1 | 92.84 |  |  | 94.01 |  |  | 91.70 |  |  | 85.68 |  |
| <10 | 82.76 |  |  | 82.31 |  |  | 89.54 |  |  | 72.58 |  |
| ≥10 | 81.17 |  |  | 78.61 |  |  | 86.76 |  |  | 68.53 |  |
| **T stage** |  | <0.001 |  |  | <0.001 |  |  | 0.002 |  |  | <0.001 |
| T1 | 96.15 |  |  | 93.53 |  |  | 94.23 |  |  | 88.16 |  |
| T2 | 88.03 |  |  | 85.74 |  |  | 93.57 |  |  | 80.20 |  |
| T3 | 86.19 |  |  | 86.22 |  |  | 88.40 |  |  | 75.80 |  |
| T4 | 77.02 |  |  | 79.28 |  |  | 84.63 |  |  | 66.18 |  |
| **N stage** |  | <0.001 |  |  | <0.001 |  |  | 0.003 |  |  | <0.001 |
| N0 | 94.43 |  |  | 95.09 |  |  | 95.09 |  |  | 90.18 |  |
| N1 | 88.28 |  |  | 87.79 |  |  | 89.31 |  |  | 77.18 |  |
| N2 | 78.55 |  |  | 76.82 |  |  | 84.11 |  |  | 67.76 |  |
| N3 | 66.90 |  |  | 67.70 |  |  | 87.89 |  |  | 56.99 |  |
| **Clinical stage** |  | <0.001 |  |  | <0.001 |  |  | 0.005 |  |  | <0.001 |
| I | 97.73 |  |  | 97.06 |  |  | 96.3 |  |  | 93.23 |  |
| II | 94.99 |  |  | 92.74 |  |  | 93.10 |  |  | 86.58 |  |
| III | 87.25 |  |  | 86.49 |  |  | 89.07 |  |  | 76.86 |  |
| IV | 75.99 |  |  | 77.74 |  |  | 85.54 |  |  | 65.27 |  |
| **Treatment** |  | 0.026 |  |  | <0.001 |  |  | 0.055 |  |  | <0.001 |
| RT alone | 93.05 |  |  | 95.67 |  |  | 95.12 |  |  | 88.57 |  |
| CCRT | 87.04 |  |  | 87.40 |  |  | 90.58 |  |  | 77.97 |  |
| IC + CCRT | 85.20 |  |  | 83.51 |  |  | 87.75 |  |  | 74.01 |  |

***Abbreviations:*** OS, overall survival; DMFS, distant metastasis-free survival; LRFS, local recurrence-free survival; PFS, progression-free survival; WHO, World Health Organization; EBV, Epstein-Barr virus; RT, radiotherapy; CCRT, concurrent chemoradiotherapy; IC, induction chemotherapy, DNA, deoxyribonucleic acid

**Table S3.** Multivariable analysis of three models regarding OS in the primary cohort

| **Steps** | **Variables** | **Multivariable Cox analysis** | | |
| --- | --- | --- | --- | --- |
| **Coef** | **HR(CI)** | ***P*-value** |
| **Blood score** | Rule1 | −0.806 | 0.45(0.25,0.8) | 0.007 |
| Rule2 | −0.541 | 0.58(0.41,0.83) | 0.003 |
| Rule3 | −0.367 | 0.69(0.49,0.97) | 0.032 |
| Rule4 | −0.311 | 0.73(0.52,1.03) | 0.073 |
| **Base model** | T stage | | | |
| T1 |  | 1(reference) |  |
| T2 | 0.933 | 2.54(1.02，5.35) | 0.014 |
| T3 | 1.141 | 3.13(1.68,5.82) | 0.000 |
| T4 | 1.784 | 5.95(3.2,11.06) | 0.000 |
| N stage | | | |
| N0 |  | 1(reference) |  |
| N1 | 0.514 | 1.67(0.98,2.87) | 0.061 |
| N2 | 1.069 | 2.91(1.62,5.23) | 0.000 |
| N3 | 1.700 | 5.48(2.91,10.31) | 0.000 |
| **Final model** | Blood_score | 0.769 | 2.16(1.59,2.93) | 0.000 |
| Age (years) | 0.027 | 1.03(1.01,1.04) | 0.000 |
| EBV DNA (103 copies/ml) | | | |
| <1 |  | 1(reference) |  |
| <10 | 0.503 | 1.65(1.07,2.55) | 0.023 |
| >=10 | 0.287 | 1.33(0.85,2.08) | 0.208 |
| T stage | |  |  |
| T1 |  | 1(reference) |  |
| T2 | 0.794 | 2.21(1.05,4.67) | 0.037 |
| T3 | 0.990 | 2.69(1.44,5.02) | 0.002 |
| T4 | 1.490 | 4.44(2.36,8.35) | 0.000 |
| N stage | | | |
| N0 |  | 1(reference) |  |
| N1 | 0.424 | 1.53(0.88,2.64) | 0.129 |
| N2 | 0.868 | 2.38(1.28,4.42) | 0.006 |
| N3 | 1.477 | 4.38(2.23,8.61) | 0.000 |

***Abbreviations:*** OS, overall survival; Coeff, coefficient; HR, hazard ratio; CI, confidence interval; EBV, Epstein-Barr virus; DNA, deoxyribonucleic acid**Figure S1.** Risk stratification using Kaplan-Meier survival curves.

*Abbreviations:* OS, overall survival; HR, hazard ratio

*Note:* Kaplan-Meier survival curves of high- and low-risk stratification based on the final model in the primary (A) and testing cohorts (B).
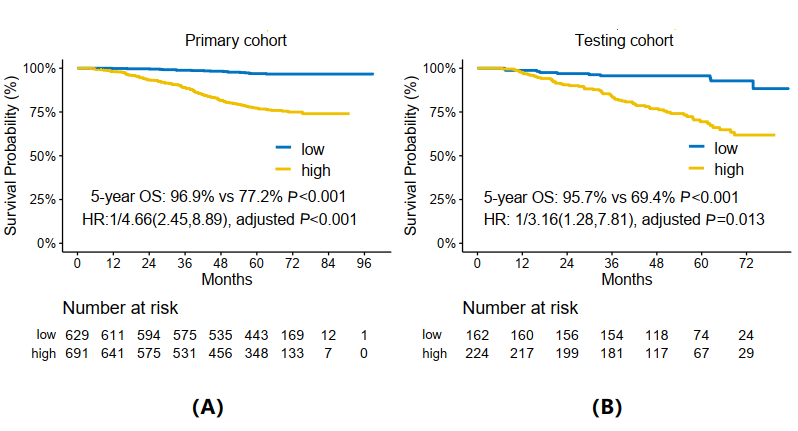


**Figure S2.** Calibration curve of the final model for 5-year OS.

*Abbreviations:* OS, overall survival

*Note:* Calibration curve of the final model for predicting 5-year OS in the primary cohort (A) and the testing cohort (B). The actual OS is plotted on the *y*-axis; the model-predicted probability of OS is plotted on the *x*-axis.
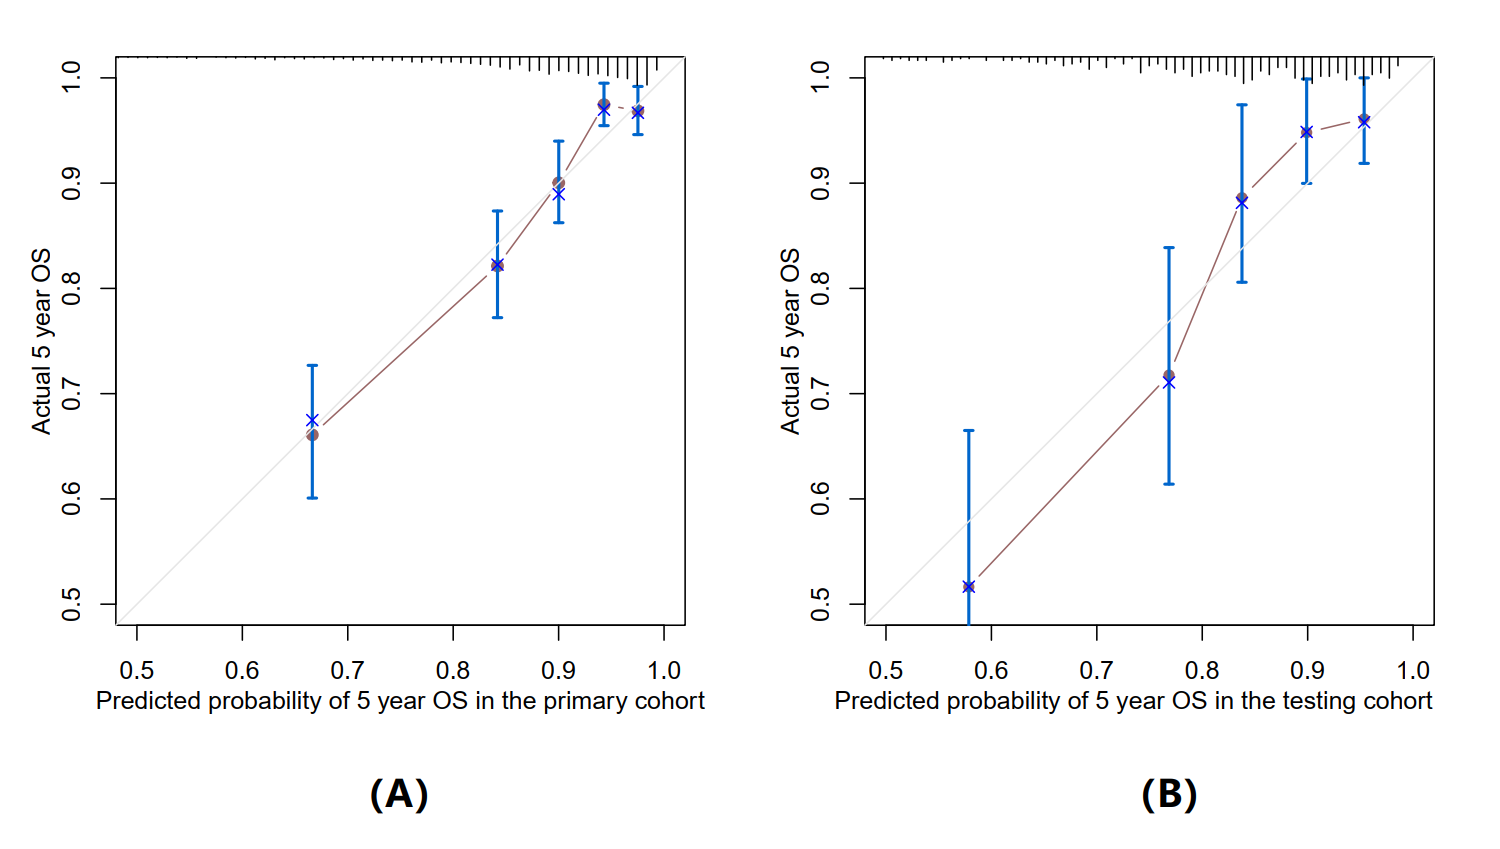

Supplement: Supplementary file 1 [file get_supplementary_file.php]
